# Supplementary material for: The SP19 chronology for the South Pole Ice Core – Part 2: gas chronology, Δage, and smoothing of atmospheric records
Source: Copernicus journal article supplement (doi:10.5194/cp-16-2431-2020), 2020-12-03
Supplement: Supplementary file 1 [file cp-16-2431-2020-supplement.zip]

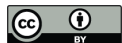

## *Supplement of*

# **The SP19 chronology for the South Pole Ice Core – Part 2: gas chronology, $\Delta$ age, and smoothing of atmospheric records**

**Jenna A. Epifanio et al.**

*Correspondence to:* Jenna A. Epifanio ([epifanij@oregonstate.edu](mailto:epifanij@oregonstate.edu))

- [cp-16-2431-2020-supplement-title-page.pdf](#)
- [SP19\\_gasdata.xlsx](#)

The copyright of individual parts of the supplement might differ from the CC BY 4.0 License.
